# Supplementary figures and images for: Enteric bacterial protein AvrA promotes colonic tumorigenesis and activates colonic beta-catenin signaling pathway
Source: Springer Nature journal article supplement (doi:10.1038/oncsis.2014.20), 2014-06-09

Figure S1

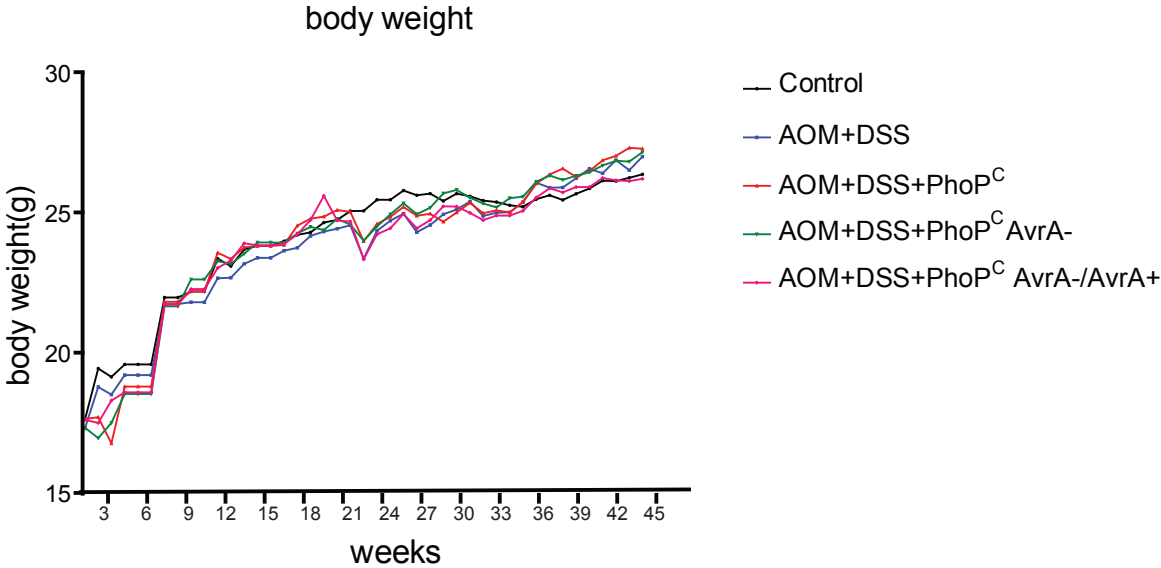

Supplement: 41389_2014_BFoncsis201420_MOESM40_ESM.pdf [file 41389_2014_BFoncsis201420_MOESM40_ESM.pdf]

Figure S2

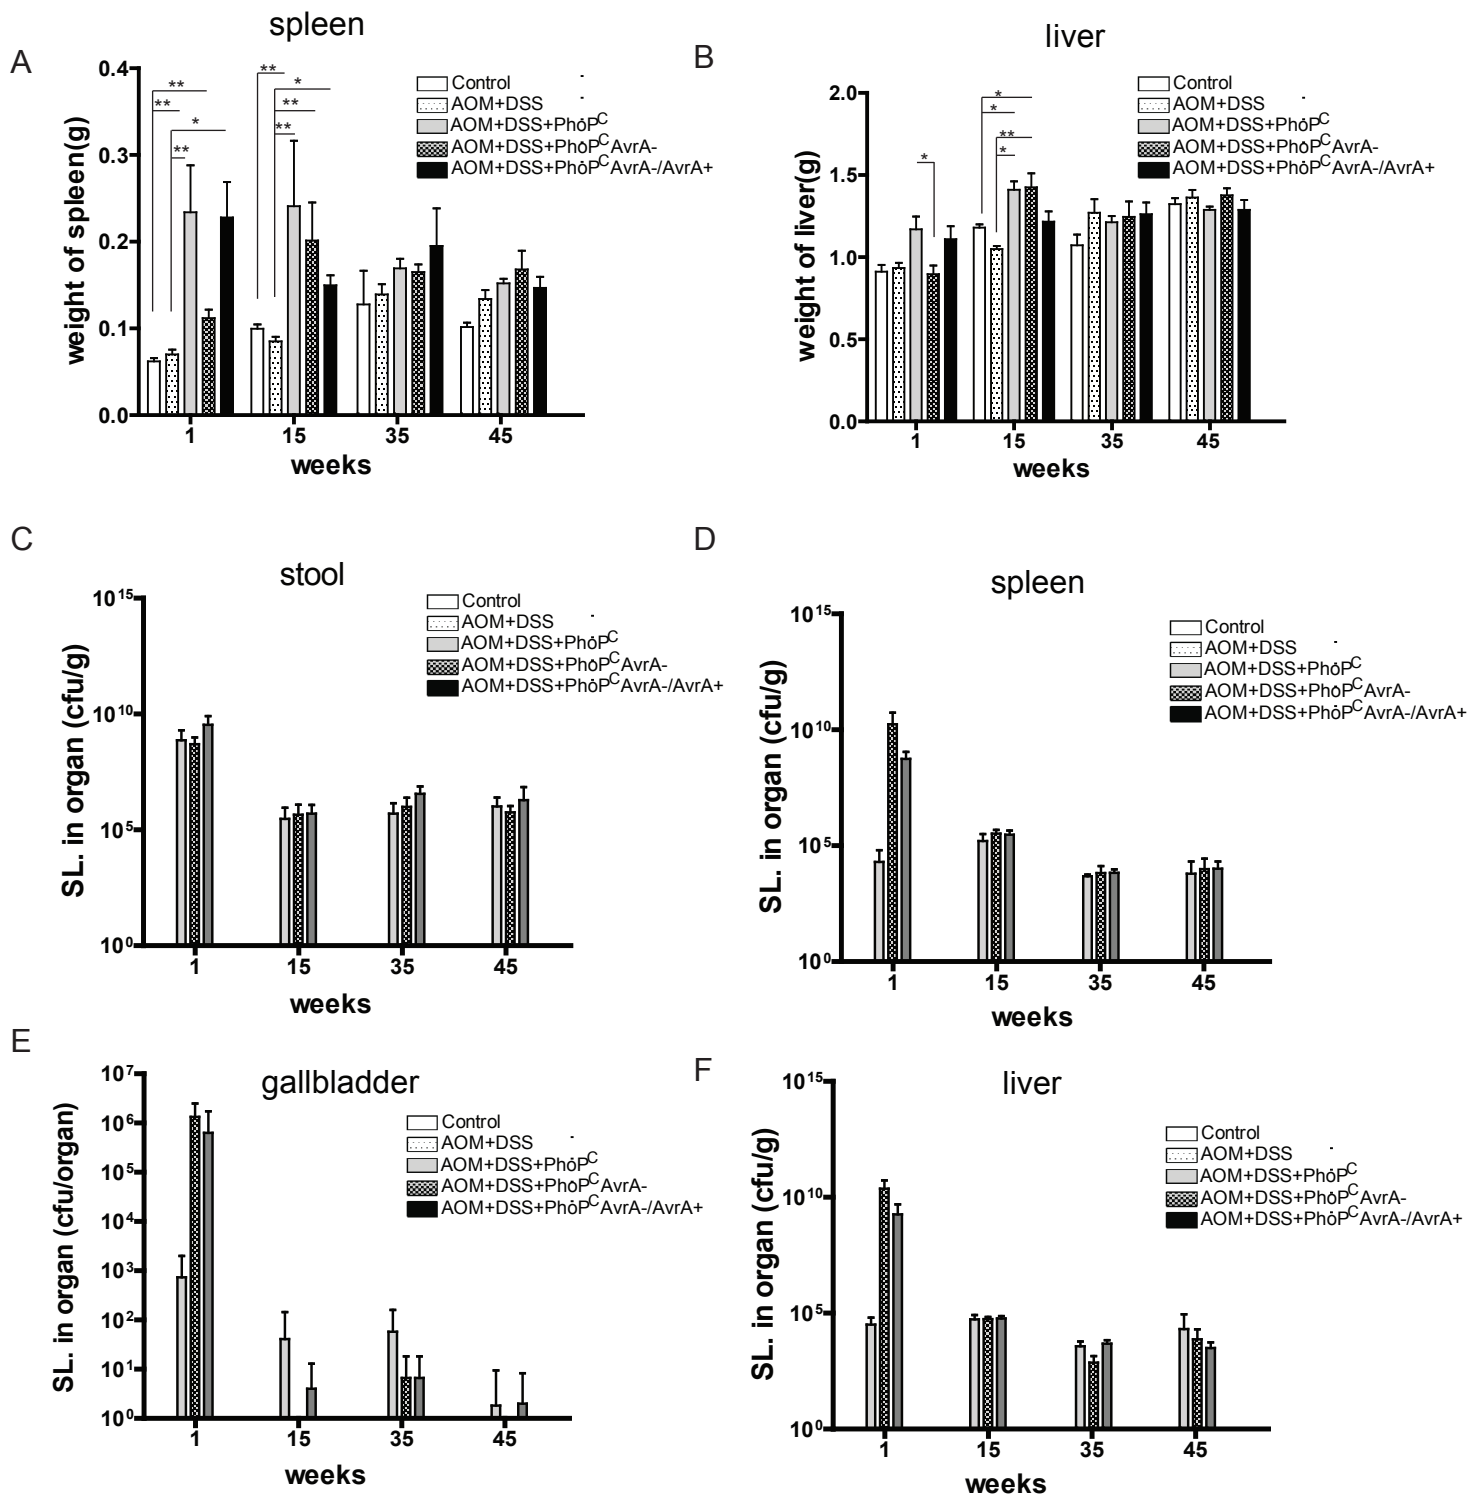

Supplement: 41389_2014_BFoncsis201420_MOESM41_ESM.pdf [file 41389_2014_BFoncsis201420_MOESM41_ESM.pdf]
