# Supplementary figures and images for: Enteric bacterial protein AvrA promotes colonic tumorigenesis and activates colonic beta-catenin signaling pathway
Source: PubMed Central journal article supplement — Oncogenesis. 2014 Jun 9;3(6):e105–. doi: 10.1038/oncsis.2014.20 (PMC4150214; doi:10.1038/oncsis.2014.20), 2014-06-09

Figure S3

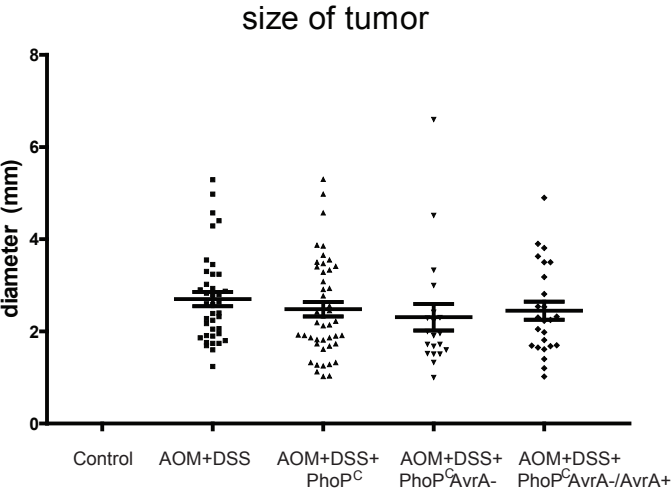

Supplement: oncsis201420x3.pdf [file oncsis201420x3.pdf]
